# Supplementary material for: Comparison of Ga-68-Labeled Fusarinine C-Based Multivalent RGD Conjugates and [68Ga]NODAGA-RGD—In Vivo Imaging Studies in Human Xenograft Tumors
Source: PubMed Central journal article supplement (PMC5010584; doi:10.1007/s11307-016-0931-3), 2016-02-23
Supplement: 11307_2016_931_MOESM1_ESM.pdf [file 11307_2016_931_MOESM1_ESM.pdf]

## Supplemental Information

# Comparison of Ga-68 labelled fusarinine C based multivalent RGD conjugates and [<sup>68</sup>Ga]NODAGA-RGD - in vivo imaging studies in human xenograft tumors

Journal: Molecular Imaging and Biology

Chuangyan Zhai,<sup>1,2</sup> Gerben M. Franssen,<sup>3</sup> Milos Petrik,<sup>4</sup> Peter Laverman,<sup>3</sup> Dominik Summer,<sup>1</sup> Christine Rangger,<sup>1</sup> Roland Haubner,<sup>1</sup> Hubertus Haas,<sup>5</sup> Clemens Decristoforo<sup>1</sup>

<sup>1</sup>Department of Nuclear Medicine, Innsbruck Medical University, Innsbruck, Austria

<sup>2</sup>Department of Nuclear Medicine, Guangdong General Hospital & Guangdong Academy of Medical Sciences, Guangzhou, China

<sup>3</sup>Department of Nuclear Medicine, Radboud University Nijmegen Medical Centre, Nijmegen, The Netherlands

<sup>4</sup>Institute of Molecular and Translational Medicine, Faculty of Medicine and Dentistry, Palacky University, Olomouc, Czech Republic

<sup>5</sup>Division of Molecular Biology, Medical University Innsbruck, Innsbruck, Austria

**Corresponding Author:** Clemens Decristoforo, PhD, Universitätsklinik für Nuklearmedizin, Medizinische Universität Innsbruck, Anichstr. 35, A-6020 Innsbruck, Austria; Phone: +43 512 504 80951; Fax: +43 512 504 6780951, e-mail: Clemens.Decristoforo@tirol-kliniken.at

**Running title:** <sup>68</sup>Ga-FSC-RGD conjugates for PET imaging

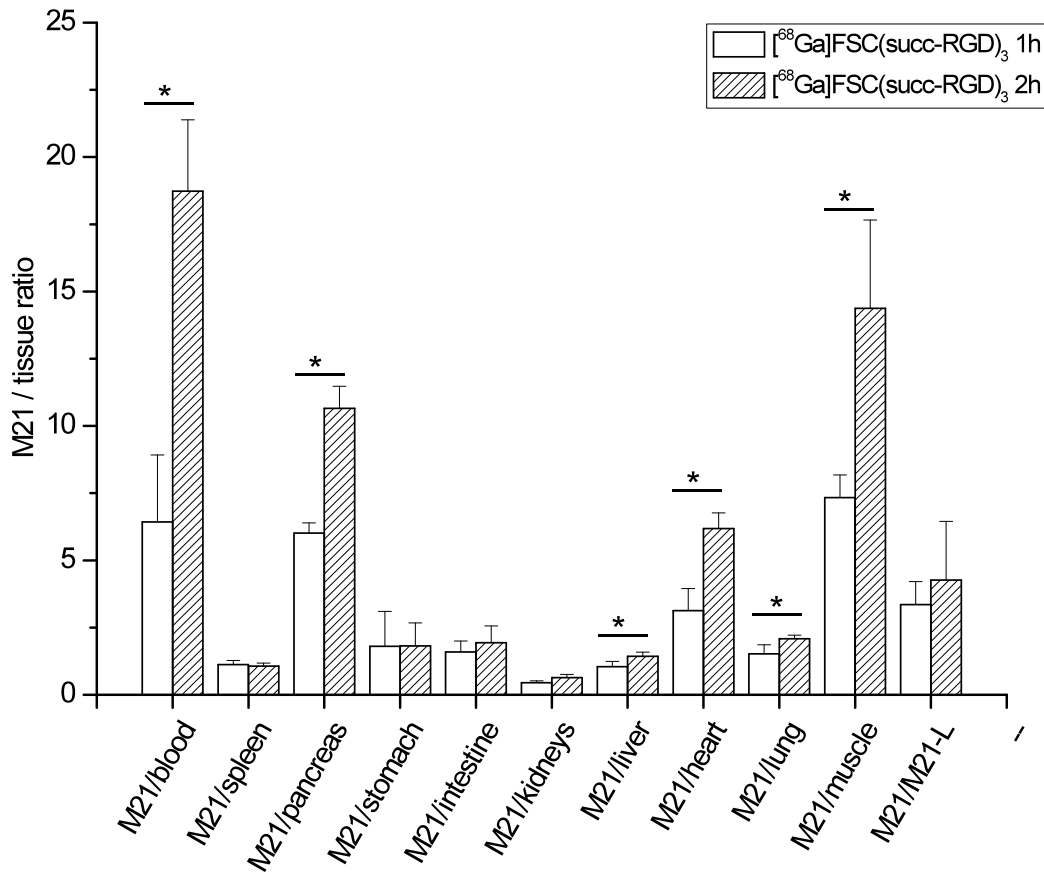

Fig. S1 Comparison of M21-to-tissue ratios of [<sup>68</sup>Ga]FSC(succ-RGD)<sub>3</sub> at 1 and 2 h p.i.. M21/M21-L human melanoma xenografted nude mice were used. Significant differences in uptake are marked with an asterisk (P = 0.05).
